# Supplementary material
Source: PubMed Central journal article supplement (PMC5673255)
Supplement: NIHMS853146-supplement-supplemental.pdf [file NIHMS853146-supplement-supplemental.pdf]

# **A Review of Oxytocin's Effects on the Positive, Negative and Cognitive Domains of Schizophrenia**

## ***Supplemental Information***

### **COGNITIVE DEFICITS (Note: Please see Main text for references in this section)**

To facilitate research and drug discovery into the cognitive abnormalities associated with schizophrenia (SCZ), the NIH-funded Measurement and Treatment Research to Improve Cognition in SCZ (MATRICS) initiative identified 7 specific domains of cognitive impairment in patients with this debilitating disorder; visual and verbal learning and memory, attention/vigilance, working memory, reasoning and problem solving, information processing speed and social cognition (1).

### **Preclinical Studies of OT's Effects on Cognitive-Like Deficits**

Numerous reports have implicated oxytocin (OT) in social cognition deficits (see (60, 61) for recent reviews). The majority of these studies are consistent with the facilitation of social recognition by OT in rodents and non-human primates. For example, Popik *et al.* found that OT infusion into the rat medial preoptic area facilitated social recognition (62). A seminal finding in this area showed that OT knockout (KO) mice failed to recognize familiar conspecifics even after repeated encounters (63-65) and this deficit was remediated by infusion of OT into the medial amygdala (66). Consistent with OT KOs, oxytocin receptor (OXTR) KO mice also exhibited social recognition deficits (67, 68). Most recently, Feifel *et al.* found that acute peripheral administration of OT restored social recognition in a strain of rats that display a natural deficit in this behavior (unpublished data). In non-human primates, intranasal (IN) OT attenuated attention to negative facial expression in rhesus monkeys (69).

There have been only a few reports on OT's effects in MATRICS-relevant animal models of non-social cognition. For example, Tomizawa *et al.* reported that OT improved long-lasting spatial memory in mice through a mitogen-activated protein kinase (MAP) cascade (70). On the other hand, OT infused into the rat nucleus basalis of Meynert inhibited spatial learning (71). Most recently, Feifel *et al.* discovered that peripheral OT facilitated latent inhibition (LI) in Brown Norway rats that exhibit a natural deficit in this parameter (72). Importantly, LI is considered by MATRICS to be a good candidate animal model for the attention/vigilance domain impaired in SCZ (73).

Along these lines, the Cognitive Neuroscience Treatment Research to Improve Cognition in SCZ (CNTRICS) initiative has chosen baseline prepulse inhibition (PPI) as a candidate model for gain control: an important construct of perception (1). In this respect, Feifel *et al.* reported peripherally administered OT attenuated natural PPI deficits in the Brown Norway rat (74). In an earlier study, this group found that the second generation antipsychotic drug clozapine—but not the first generation antipsychotic drug haloperidol—improved PPI in Brown Norway rats suggesting that OT's facilitation of PPI is not related to its inhibition of dopamine functioning (75). In contrast to findings consistent with therapeutic-like effects of OT on PPI, Huang *et al.* recently reported that 21 days of IN OT had no effect on PPI in male mice (46); however this finding is difficult to interpret since it was not determined whether a single dose of OT facilitates PPI in mice.

Aside from effects on the above-mentioned cognitive-like domains, numerous studies over the last four decades suggest that OT modulates memory processes in a variety of species including rats, and mice (76, 77). These memory effects, notably, vary based on the paradigm studied. For example, in rodents acute OT improves memory consolidation in a passive avoidance paradigm. However, it has long-term inhibitory effects on acquisition, retention, consolidation and retrieval (see (78) for review).

## **Exogenous OT Effects on Cognitive Deficits**

### *Social Cognition Deficits*

The effects of IN OT on social cognition in healthy subjects are reviewed in Evans *et al.* (79). In toto, these studies have consistently shown that a single administration of IN OT acutely enhanced the processing of social stimuli. Similarly, in SCZ patients, a single dose of IN OT enhanced recognition of emotion, sarcasm, deception and empathy (80-84).

Regarding the effects of chronic OT treatment on social cognition in patients with SCZ, IN OT twice a day for 2 - 6 weeks improved social perception and theory of mind (35) as well as fear recognition and the perspective-taking component of empathy (38). Similarly, Davis *et al.* (41) found that administering IN OT just prior to twice weekly social cognitive training for six weeks in patients with SCZ significantly enhanced the training's benefit on a subject's ability to detect empathic accuracy, an effect that lasted at least one month. In contrast, Cacciotti-Salja *et al.* found no benefit when OT was administered twice a day to SCZ subjects while they underwent 6 weeks of social cognitive training (40). The inconsistent effects of OT on the benefits of social cognitive training may have been due to differences in training methods employed by the two studies (40, 41).

Very recently, Shin *et al.* (85) produced the first report of effects of OT on neural activity associated with social cognition (facial emotion recognition) in SCZ. This group found a single dose of IN OT decreased amygdala activity for fearful faces and increased activity (fMRI) for happy faces, a result consistent with numerous other reports of changes in amygdala activity during emotional recognition tasks in normal controls (86). Putative brain circuits implicated in OT's effects on social cognition are displayed in Figure 1 (Main text).

### *Non-Social Cognitive Deficits*

There is an overall dearth of reports on the therapeutic effects of OT on non-social cognitive deficits. In one study, OT improved a measure of learning and verbal memory (the California Verbal Learning Test) but not a test of working memory (Letter Number Sequence) in patients with SCZ (87). On the other hand, Michalopoulou *et al.* recently reported that a single dose of OT improved the “executive” component of working memory in patients with SCZ (88). As in all the studies reviewed, these contrasting results may be due to different dosages or duration of OT treatment employed (see study details in Table 2, main section), highlighting the important reality that optimal dose and dosing of OT are understudied.

## **ENDOGENOUS OT AND SCHIZOPHRENIA**

**(Note: Please see Supplemental References, below, for references in this section)**

### **The Endogenous OT System and Positive Symptoms**

Only a few reports have examined a relationship between pOT and positive symptoms in patients with SCZ (Table S1). For example, Rubin *et al.* reported female patients with higher pOT had less severe positive symptoms and overall psychopathology (1). In contrast, a more recent study by the same group found that higher pOT levels related to more severe positive symptoms (2).

It is important to note here that substantial evidence suggests that pOT levels may not reliably reflect CSF OT concentrations, and therefore may not be relevant to the behaviors of interest (3, 4), but see (5).

### **The Endogenous OT System and Negative Symptoms**

Converging evidence is consistent with an inverse relationship between endogenous OT levels and negative symptoms of SCZ. For example, studies have shown that both pOT (6) and cerebrospinal fluid (7) levels of OT exhibit a negative correlation with PANSS negative subscale scores in male patients with SCZ. More recently, Strauss *et al.* also found that low pOT levels predict the severity of asociality in SCZ patients (8). Similarly, decreased pOT levels measured after trust-related interactions were associated with negative symptoms of SCZ, suggesting that decreased trust-related OT release may be associated with social withdrawal, isolation, and flattened affect in this disorder (9). As part of a growing literature on the clinical import of OT and OXTR gene variants (10), several genomic studies have found evidence for an association of OXTR and OT gene variants with the negative symptoms of SCZ. In this respect, OXTR gene variants rs237902 and rs53576 were significantly associated with PANSS negative symptoms scores (11) and emotional withdrawal (12), respectively. In addition, Souza *et al.* found that the OT gene variant (rs2740204) was nominally associated with negative symptoms (13).

### **The Endogenous OT System and Cognitive Deficits**

Higher pOT levels in SCZ have been related to several parameters related to the cognitive domains discussed above: larger anterior hippocampal volumes, superior emotion recognition (14), more prosocial behavior in males & females and perception of faces as happier by females and controls but not males (15). In an approach-avoidance task, patients with SCZ with higher pOT levels exhibited increased avoidance of angry faces (16) suggesting that elevated levels of endogenous OT increased social awareness in patients with SCZ. Most recently, Strauss *et al.* reported higher that pOT levels were associated with better emotion recognition in controls and SCZ (female only) (17) and more accurate encoding of socially relevant information in SCZ Strauss *et al.* (18). On the other hand, Rubin *et al.* (2, 19) reported no difference in pOT levels between SCZ and control subjects and found that patients' OT levels were not related to clinical

symptoms or cognition. In genetic studies, the OXTR variants rs22544298 and rs2268493 were significantly associated with empathic concern (20) and poorer performance on a social cognition index, mentalizing and social perception in patients with SCZ (21), respectively.

Regarding non-social cognitive deficits, Frost *et al.* failed to find differences between pOT levels in SCZ and control subjects. However, in both groups, higher pOT levels were associated with superior processing speed, working memory, and social cognition (22).

**Table S1.** The Endogenous Oxytocin System in Patients with Schizophrenia: Relation to Symptom Domains

| Authors                         | N                                                                         | OT Parameter      | Main Findings                                                                                                                              | Implications                                                                                                       |
|---------------------------------|---------------------------------------------------------------------------|-------------------|--------------------------------------------------------------------------------------------------------------------------------------------|--------------------------------------------------------------------------------------------------------------------|
| <b>Positive Symptoms</b>        |                                                                           |                   |                                                                                                                                            |                                                                                                                    |
| Rubin <i>et al.</i> 2010 (1)    | 50 SCZ (27 M, 23 F)<br>58 CTL                                             | pOT               | Female patients with higher pOT levels had less severe positive symptoms and overall psychopathology                                       | Sex differences in clinical course of SCZ (23, 24). Estrogen and prolactin regulate OT and OXTR expression (25-28) |
| Souza <i>et al.</i> 2010 (13)   | 140 M and F SCZ                                                           | OT and OXTR SNPs  | Variants in the OXTR (rs237887) were nominally associated with positive symptoms                                                           | Supports a role for OT system in regulating positive symptoms                                                      |
| Rubin <i>et al.</i> 2013 (19)   | 38 SCZ (24 M, 14 F)<br>38 CTL                                             | pOT               | pOT did not differ between patients and CTL and were unrelated to severity of positive symptoms                                            | Discrepant with (1)                                                                                                |
| Rubin <i>et al.</i> 2014 (2)    | 57 SCZ (M 35 F 22)<br>34 SCZA (M 15, F 19)<br>75 BP (M 24, F 8)<br>42 CTL | pOT               | pOT did not differ between patients and CTL and were unrelated to severity of positive symptoms                                            | Does not support a role of endogenous OT in manifestation of positive symptoms                                     |
| <b>Negative Symptoms</b>        |                                                                           |                   |                                                                                                                                            |                                                                                                                    |
| Keri <i>et al.</i> 2009 (9)     | 50 SCZ (16 M, 34 F)<br>50 CTL                                             | pOT               | Low pOT after trust-related interactions were associated with negative symptom                                                             | Suggests endogenous OT counteracts negative symptoms                                                               |
| Souza <i>et al.</i> 2010 (13)   | Vide supra                                                                | OT and OXTR SNPs  | An OT gene variant (rs2740204) was associated with clozapine response and was nominally associated with negative symptoms                  | The endogenous OT system may mediate the effects of APDs (29, 30)                                                  |
| Sasayama <i>et al.</i> 2012 (7) | 27 M SCZ, 17 M MDD<br>21 CTL                                              | cOT               | More severe negative symptoms (PANSS) related to lower cOT                                                                                 |                                                                                                                    |
| Montag <i>et al.</i> 2013 (11)  | 406 SCZ (285 M,<br>121 F)<br><br>406 CTL                                  | OT and OXTR genes | Significant association between OXTR variant rs237902 and negative symptoms scores (PANSS), and OXTR variants rs53576 and rs237885 and SCZ |                                                                                                                    |

| <b>Authors</b>                  | <b>N</b>                               | <b>OT Parameter</b>       | <b>Main Findings</b>                                                                                                                                                                                          | <b>Implications</b>                                                                                                                                                                                                            |
|---------------------------------|----------------------------------------|---------------------------|---------------------------------------------------------------------------------------------------------------------------------------------------------------------------------------------------------------|--------------------------------------------------------------------------------------------------------------------------------------------------------------------------------------------------------------------------------|
| Haram <i>et al.</i> 2015 (12)   | 265 SCZ (Sex not indicated)<br>412 CTL | OT, OXTR, AVP, CD38 genes | Significant association between OXTR variant rs53576 and emotional withdrawal<br><br>No significant associations between OT pathway gene variants and SCZ                                                     | Consistent with (11), suggesting a role for OXTR variant rs53576 in the negative symptoms of SCZ                                                                                                                               |
| Strauss <i>et al.</i> 2015 (8)  | 39 SCZ (28 M, 11 F)<br>21 CTL          | pOT                       | pOT levels higher in SCZ compared to controls. Lower OT levels associated with greater severity of asociality in SCZ                                                                                          |                                                                                                                                                                                                                                |
| Jobst <i>et al.</i> 2015 (6)    | 41 M SCZ<br>45 CTL                     | pOT                       | More severe negative symptoms, e.g., emotional and social withdrawal (PANSS), related to lower pOT                                                                                                            |                                                                                                                                                                                                                                |
| <b>Cognitive Deficits</b>       |                                        |                           |                                                                                                                                                                                                               |                                                                                                                                                                                                                                |
| Goldman <i>et al.</i> 2008 (14) | 15 SCZ (6 PHS, 4 PNS, 5 NNS), 7 CTL    | pOT                       | pOT increased in PHS patients compared to PNS or NNSA or controls, and higher pOT associated with greater accuracy in rating facial emotions<br><br>pOT inversely correlated with anterior hippocampal volume | Along with (31), indicates potential of differential role of OT in various subtypes, especially PHS. PHS also exhibit impaired hippocampal function and structural pathology in amygdala, and anterior and lateral hippocampus |
| Keri <i>et al.</i> 2009 (9)     | Vide supra                             | pOT                       | CTL subjects exhibited elevated pOT after trust related interactions, whereas subjects with SCZ did not                                                                                                       | Suggests a defect in OT systems ability to respond to interactions promoting trust consistent with OT effects on facial affect recognition (31-36)                                                                             |
| Rubin <i>et al.</i> 2010 (1)    | Vide supra                             | pOT                       | In both sexes, patients with higher pOT exhibited more prosocial behaviors (PANSS)                                                                                                                            | Suggests endogenous OT promotes prosocial behavior                                                                                                                                                                             |
| Rubin <i>et al.</i> 2011 (15)   | 48 SCZ (26 M, 22 F)<br>57 CTL          | pOT                       | Higher pOT related to perceiving faces as happier in both female patients and CTL                                                                                                                             | Sex differences reported in other studies of pOT (37, 38) and in (39) but not other studies of IN OT (40, 41)                                                                                                                  |
| Montag <i>et al.</i> 2012 (20)  | 145 SCZ (91 M, 54 F)<br>145 CTL        | OXTR gene                 | OXTR variant rs22544298 significantly associated with empathic concern                                                                                                                                        |                                                                                                                                                                                                                                |



| <b>Authors</b>                     | <b>N</b>                             | <b>OT Parameter</b> | <b>Main Findings</b>                                                                                                                                                                                               | <b>Implications</b>                                                                         |
|------------------------------------|--------------------------------------|---------------------|--------------------------------------------------------------------------------------------------------------------------------------------------------------------------------------------------------------------|---------------------------------------------------------------------------------------------|
| Rubin <i>et al.</i> 2013 (19)      | Vide supra                           | pOT                 | pOT unrelated to cognition in SCZ                                                                                                                                                                                  | Association of endogenous AVP and worse cognition in untreated female but not male patients |
| Walss-Bass <i>et al.</i> 2013 (42) | 60 SCZ (45 M, 15 F)<br>20 CTL        | pOT                 | Significant correlations between social cognitive bias and pOT in control group and patients with SCZ with delusions. Social cognitive capacity only correlated with pOT in patients with SCZ exhibiting delusions |                                                                                             |
| Rubin <i>et al.</i> 2014 (2)       | Vide supra                           | pOT                 | Higher pOT associated with better emotion recognition in healthy controls but not in proband or relative group                                                                                                     |                                                                                             |
| Davis <i>et al.</i> 2014 (21)      | 74 SCZ (M 53, F 21)                  | OXTR gene           | OXTR variant (rs2268493) was significantly associated with poorer performance on a social cognition index, as well as tests of mentalizing and social perception                                                   |                                                                                             |
| Frost <i>et al.</i> 2014 (22)      | 31 SCZ (sex not specified)<br>21 CTL | pOT                 | Higher pOT associated with superior processing speed, working memory, and social cognition                                                                                                                         |                                                                                             |
| Brown <i>et al.</i> 2014 (16)      | 28 M SCZ                             | pOT                 | In an approach-avoidance task, patients with SCZ with higher pOT levels exhibited increased avoidance of angry faces                                                                                               | Suggested elevated levels of endogenous OT increased social awareness in patients with SCZ  |
| Strauss <i>et al.</i> 2015 (17)    | 41 SCZ (sex not specified)<br>22 CTL | pOT                 | Higher pOT levels associated with better emotion recognition in CTL and SCZ (female only)                                                                                                                          | Individual differences in endogenous OT predict emotion perception accuracy                 |
| Strauss <i>et al.</i> 2015 (18)    | 40 SCZ (28 M, 12 F)<br>22 CTL        | pOT                 | SCZ had higher pOT compared to CTL. Fewer false positives for concrete items on SCRT associated with higher pOT in SCZ                                                                                             | In SCZ, accurate encoding of socially relevant information predicted by pOT                 |

| Authors                           | N                                                                                                                                                 | OT Parameter                                      | Main Findings                                                                                                                                                                                                                                             | Implications                                                                                                                                                                                       |
|-----------------------------------|---------------------------------------------------------------------------------------------------------------------------------------------------|---------------------------------------------------|-----------------------------------------------------------------------------------------------------------------------------------------------------------------------------------------------------------------------------------------------------------|----------------------------------------------------------------------------------------------------------------------------------------------------------------------------------------------------|
| <b>Domain Not Specified</b>       |                                                                                                                                                   |                                                   |                                                                                                                                                                                                                                                           |                                                                                                                                                                                                    |
| Linkowski <i>et al.</i> 1984 (43) | 12 SCZ (9 M, 3 F)<br>12 CTL                                                                                                                       | Plasma Np1                                        | Basal Np1 levels were decreased compared to CTL                                                                                                                                                                                                           |                                                                                                                                                                                                    |
| Beckman <i>et al.</i> 1985 (44)   | 28 M SCZ, 15 CTL                                                                                                                                  | cOT                                               | cOT increased in patients with SCZ and higher in patients on APDs (butyrophenones)                                                                                                                                                                        | Relevance of cOT to central function in patients on APDs - see (45)                                                                                                                                |
| Legros <i>et al.</i> 1992 (45)    | 9 M SCZ, 14 M CTL                                                                                                                                 | Plasma Np1                                        | Basal Np1 levels were decreased compared to CTL                                                                                                                                                                                                           |                                                                                                                                                                                                    |
| Mai <i>et al.</i> 1993 (46)       | 11 SCZ (sex not indicated), 10 CTL                                                                                                                | Neurophysin staining in post mortem brain samples | Altered neurophysin staining in PVN, globus pallidus, substantia nigra in SCZ vs. CTL                                                                                                                                                                     | Primarily untreated patients so not due to effects of medication                                                                                                                                   |
| Glovinsky <i>et al.</i> 1994 (47) | 40 SCZ (31 M, 9 F)<br>15 CTL                                                                                                                      | cOT                                               | cOT levels did not differ within subjects based on APD status (treated or withdrawn), nor between SCZ and CTL                                                                                                                                             |                                                                                                                                                                                                    |
| Souza <i>et al.</i> 2010 (48)     | 179 SCZ (sex not indicated), 358 CTL                                                                                                              | OT, OXTR genes                                    | OT variants rs4813625 and rs3761248 nominally associated with SCZ                                                                                                                                                                                         |                                                                                                                                                                                                    |
| Watanabe <i>et al.</i> 2012 (49)  | 1) 544 SCZ (290 M, 254 F), 674 CTL<br>2) 105 family based trios consisting of patients (59 M, 46 F) and both parents                              | OXTR gene                                         | No significant associations in either the case control or trio study. Meta analysis detected nominal significance between OXTR variant (rs9840864) and SCZ                                                                                                |                                                                                                                                                                                                    |
| Teltsh <i>et al.</i> 2012 (50)    | 1) Extended pedigree 25 SCZ spectrum, 31 unaffected family members<br>2) 52 families (90 SCZ, 96 unaffected)<br>3) 272 SCZ (177 M, 95 F), 273 CTL | OT, AVP genes                                     | 1) Two OT variants (rs4813626), (rs2740204) and one AVP variant (AVP3011589) significantly associated with SCZ<br>2) One OT variant (rs4813626) significantly associated with SCZ<br>3) One OT variant (rs4813626) significantly associated with male SCZ | One SNP (rs4813626) in OT gene significantly associated with SCZ in all three samples. However, its minor and major alleles in samples 2 and 3 were opposite to the extended pedigree in sample 1. |

APD, antipsychotic drug; AVP, arginine vasopressin; CTL, controls; MDD, major depressive disorder; NNS, nonpolydipsic normonatremic schizophrenia; NP1, neurophysin for oxytocin; OT, oxytocin; cOT, cerebrospinal fluid oxytocin; pOT, plasma oxytocin; OXTR, oxytocin receptor; PANSS, Positive and Negative Syndrome Scale; PHS, polydipsic hyponatremic schizophrenia; PNS, polydipsic normonatremic schizophrenia; PVN, paraventricular nucleus; SCZ, schizophrenia; SCRT, Social Cue Recognition Test.

## **SUPPLEMENTAL REFERENCES (for Endogenous OT and Schizophrenia section)**

1. Rubin LH, Carter CS, Drogos L, Pournajafi-Nazarloo H, Sweeney JA, Maki PM (2010): Peripheral oxytocin is associated with reduced symptom severity in schizophrenia. *Schizophr Res* 124:13-21.
2. Rubin LH, Carter CS, Bishop JR, Pournajafi-Nazarloo H, Drogos LL, Hill SK, et al. (2014): Reduced levels of vasopressin and reduced behavioral modulation of oxytocin in psychotic disorders. *Schizophr Bull.* 40:1374-1384.
3. Kagerbauer SM, Martin J, Schuster T, Blobner M, Kochs EF, Landgraf R (2013): Plasma oxytocin and vasopressin do not predict neuropeptide concentrations in human cerebrospinal fluid. *J Neuroendocrinol* 25:668-673.
4. Takagi T, Tanizawa O, Otsuki Y, Sugita N, Haruta M, Yamaji K (1985): Oxytocin in the cerebrospinal fluid and plasma of pregnant and nonpregnant subjects. *Horm Metab Res* 17:308-310.
5. Carson DS, Berquist SW, Trujillo TH, Garner JP, Hannah SL, Hyde SA, et al. (2015): Cerebrospinal fluid and plasma oxytocin concentrations are positively correlated and negatively predict anxiety in children. *Mol Psychiatry* 20:1085-1090.
6. Jobst A, Dehning S, Ruf S, Notz T, Buchheim A, Henning-Fast K, et al. (2014): Oxytocin and vasopressin levels are decreased in the plasma of male schizophrenia patients. *Acta Neuropsychiatr* 26:347-355.
7. Sasayama D, Hattori K, Teraishi T, Hori H, Ota M, Yoshida S, et al. (2012): Negative correlation between cerebrospinal fluid oxytocin levels and negative symptoms of male patients with schizophrenia. *Schizophr Res* 139:201-206.
8. Strauss GP, Keller WR, Koenig JI, Gold JM, Ossenfort KL, Buchanan RW (2015): Plasma oxytocin levels predict olfactory identification and negative symptoms in individuals with schizophrenia. *Schizophr Res* 162:57-61.
9. Keri S, Kiss I, Kelemen O (2009): Sharing secrets: oxytocin and trust in schizophrenia. *Soc Neurosci* 4:287-293.
10. Kumsta R, Heinrichs M (2013): Oxytocin, stress and social behavior: neurogenetics of the human oxytocin system. *Curr Opin Neurobiol* 23:11-16.
11. Montag C, Brockmann EM, Bayerl M, Rujescu D, Muller DJ, Gallinat J (2013): Oxytocin and oxytocin receptor gene polymorphisms and risk for schizophrenia: a case-control study. *World J Biol Psychiatry* 14:500-508.
12. Haram M, Tesli M, Bettella F, Djurovic S, Andreassen OA, Melle I (2015): Association between genetic variation in the oxytocin receptor gene and emotional withdrawal, but not between oxytocin pathway genes and diagnosis in psychotic disorders. *Front Hum Neurosci* 9:9.

13. Souza RP, de Luca V, Meltzer HY, Lieberman JA, Kennedy JL (2010): Schizophrenia severity and clozapine treatment outcome association with oxytocinergic genes. *Int J Neuropsychopharmacol* 13:793-798.
14. Goldman M, Marlow-O'Connor M, Torres I, Carter CS (2008): Diminished plasma oxytocin in schizophrenic patients with neuroendocrine dysfunction and emotional deficits. *Schizophr Res* 98:247-255.
15. Rubin LH, Carter CS, Drogos L, Jamadar R, Pournajafi-Nazarloo H, Sweeney JA, et al. (2011): Sex-specific associations between peripheral oxytocin and emotion perception in schizophrenia. *Schizophr Res* 130:266-270.
16. Brown EC, Tas C, Kuzu D, Esen-Danaci A, Roelofs K, Brune M (2014): Social approach and avoidance behaviour for negative emotions is modulated by endogenous oxytocin and paranoia in schizophrenia. *Psychiatry Res* 219:436-442.
17. Strauss GP, Keller WR, Koenig JI, Sullivan SK, Gold JM, Buchanan RW (2015): Endogenous oxytocin levels are associated with the perception of emotion in dynamic body expressions in schizophrenia. *Schizophr Res* 162:52-56.
18. Strauss GP, Keller WR, Koenig JI, Gold JM, Frost KH, Buchanan RW (2015): Plasma oxytocin levels predict social cue recognition in individuals with schizophrenia. *Schizophr Res* 162:47-51.
19. Rubin LH, Carter CS, Bishop JR, Pournajafi-Nazarloo H, Harris MS, Hill SK, et al. (2013): Peripheral vasopressin but not oxytocin relates to severity of acute psychosis in women with acutely-ill untreated first-episode psychosis. *Schizophr Res* 146:138-143.
20. Montag C, Brockmann EM, Lehmann A, Muller DJ, Rujescu D, Gallinat J (2012): Association between oxytocin receptor gene polymorphisms and self-rated 'empathic concern' in schizophrenia. *PLoS One* 7:e51882.
21. Davis MC, Horan WP, Nurmi EL, Rizzo S, Li W, Sugar CA, et al. (2014): Associations between oxytocin receptor genotypes and social cognitive performance in individuals with schizophrenia. *Schizophr Res* 159:353-357.
22. Frost K, Keller W, Buchanan R, Gold J, Koenig J, Ossenfort K, et al. (2014): C-14 plasma oxytocin levels are associated with impaired social cognition and neurocognition in schizophrenia. *Archives of Clinical Neuropsychology* 29:577-578.
23. Figueira ML, Ouakinin S (2010): Gender-related endocrinological dysfunction and mental disorders. *Curr Opin Psychiatry* 23:369-372.
24. Mendrek A, Stip E (2011): Sexual dimorphism in schizophrenia: is there a need for gender-based protocols? *Expert Rev Neurother* 11:951-959.
25. Champagne F, Diorio J, Sharma S, Meaney MJ (2001): Naturally occurring variations in maternal behavior in the rat are associated with differences in estrogen-inducible central oxytocin receptors. *Proc Natl Acad Sci U S A* 98:12736-12741.

26. Patisaul HB, Scordalakes EM, Young LJ, Rissman EF (2003): Oxytocin, but not oxytocin receptor, is regulated by oestrogen receptor beta in the female mouse hypothalamus. *J Neuroendocrinol* 15:787-793.
27. Murakami G, Hunter RG, Fontaine C, Ribeiro A, Pfaff D (2011): Relationships among estrogen receptor, oxytocin and vasopressin gene expression and social interaction in male mice. *Eur J Neurosci* 34:469-477.
28. Popeski N, Amir S, Diorio J, Woodside B (2003): Prolactin and oxytocin interaction in the paraventricular and supraoptic nuclei: effects on oxytocin mRNA and nitric oxide synthase. *J Neuroendocrinol* 15:687-696.
29. Uvnas-Moberg K, Alster P, Svensson TH (1992): Amperozide and clozapine but not haloperidol or raclopride increase the secretion of oxytocin in rats. *Psychopharmacology (Berl)* 109:473-476.
30. Kiss A, Bundzikova J, Pirnik Z, Mikkelsen JD (2010): Different antipsychotics elicit different effects on magnocellular oxytocinergic and vasopressinergic neurons as revealed by Fos immunohistochemistry. *J Neurosci Res* 88:677-685.
31. Goldman MB, Gomes AM, Carter CS, Lee R (2011): Divergent effects of two different doses of intranasal oxytocin on facial affect discrimination in schizophrenic patients with and without polydipsia. *Psychopharmacology (Berl)* 216:101-110.
32. Averbeck BB, Bobin T, Evans S, Shergill SS (2011): Emotion recognition and oxytocin in patients with schizophrenia. *Psychol Med* 1-8.
33. Fischer-Shofty M, Brune M, Ebert A, Shefet D, Levkovitz Y, Shamay-Tsoory SG (2013): Improving social perception in schizophrenia: the role of oxytocin. *Schizophr Res* 146:357-362.
34. Davis MC, Lee J, Horan WP, Clarke AD, McGee MR, Green MF, et al. (2013): Effects of single dose intranasal oxytocin on social cognition in schizophrenia. *Schizophr Res* 147:393-397.
35. Pedersen CA, Gibson CM, Rau SW, Salimi K, Smedley KL, Casey RL, et al. (2011): Intranasal oxytocin reduces psychotic symptoms and improves Theory of Mind and social perception in schizophrenia. *Schizophr Res* 132:50-53.
36. Gibson CM, Penn DL, Smedley KL, Leserman J, Elliott T, Pedersen CA (2014): A pilot six-week randomized controlled trial of oxytocin on social cognition and social skills in schizophrenia. *Schizophr Res* 156:261-265.
37. Gordon I, Zagoory-Sharon O, Leckman JF, Feldman R (2010): Oxytocin and the development of parenting in humans. *Biol Psychiatry* 68:377-382.
38. Holt-Lunstad J, Birmingham W, Light KC (2011): The influence of depressive symptomatology and perceived stress on plasma and salivary oxytocin before, during and after a support enhancement intervention. *Psychoneuroendocrinology* 36:1249-1256.

39. Domes G, Lischke A, Berger C, Grossmann A, Hauenstein K, Heinrichs M, et al. (2010): Effects of intranasal oxytocin on emotional face processing in women. *Psychoneuroendocrinology* 35:83-93.
40. Bartz JA, Zaki J, Bolger N, Ochsner KN (2011): Social effects of oxytocin in humans: context and person matter. *Trends Cogn Sci* 15:301-309.
41. Macdonald KS (2012): Sex, receptors, and attachment: a review of individual factors influencing response to oxytocin. *Front Neurosci* 6:194.
42. Walss-Bass C, Fernandes JM, Roberts DL, Service H, Velligan D (2013): Differential correlations between plasma oxytocin and social cognitive capacity and bias in schizophrenia. *Schizophr Res* 147:387-392.
43. Linkowski P, Geenen V, Kerkhofs M, Mendlewicz J, Legros JJ (1984): Cerebrospinal fluid neurophysins in affective illness and in schizophrenia. *Eur Arch Psychiatry Neurol Sci* 234:162-165.
44. Beckmann H, Lang RE, Gattaz WF (1985): Vasopressin--oxytocin in cerebrospinal fluid of schizophrenic patients and normal controls. *Psychoneuroendocrinology* 10:187-191.
45. Legros JJ, Gazzotti C, Carvelli T, Franchimont P, Timsit-Berthier M, von Frenckell R, et al. (1992): Apomorphine stimulation of vasopressin- and oxytocin-neurophysins. Evidence for increased oxytocinergic and decreased vasopressinergic function in schizophrenics. *Psychoneuroendocrinology* 17:611-617.
46. Mai JK, Berger K, Sofroniew MV (1993): Morphometric evaluation of neurophysin-immunoreactivity in the human brain: pronounced inter-individual variability and evidence for altered staining patterns in schizophrenia. *J Hirnforsch* 34:133-154.
47. Glovinsky D, Kalogeras KT, Kirch DG, Suddath R, Wyatt RJ (1994): Cerebrospinal fluid oxytocin concentration in schizophrenic patients does not differ from control subjects and is not changed by neuroleptic medication. *Schizophr Res* 11:273-276.
48. Souza RP, Ismail P, Meltzer HY, Kennedy JL (2010): Variants in the oxytocin gene and risk for schizophrenia. *Schizophr Res* 121:279-280.
49. Watanabe Y, Kaneko N, Nunokawa A, Shibuya M, Egawa J, Someya T (2012): Oxytocin receptor (OXTR) gene and risk of schizophrenia: case-control and family-based analyses and meta-analysis in a Japanese population. *Psychiatry Clin Neurosci* 66:622.
50. Teltsh O, Kanyas-Sarner K, Rigbi A, Greenbaum L, Lerer B, Kohn Y (2012): Oxytocin and vasopressin genes are significantly associated with schizophrenia in a large Arab-Israeli pedigree. *Int J Neuropsychopharmacol* 15:309-319.
